# Supplementary material for: Observational data from uncrewed systems over Southern Great Plains
Source: Copernicus journal article supplement (doi:10.5194/essd-2022-73), 2022-03-21
Supplement: Supplementary file 1 [file essd-2022-73-supplement.pdf]

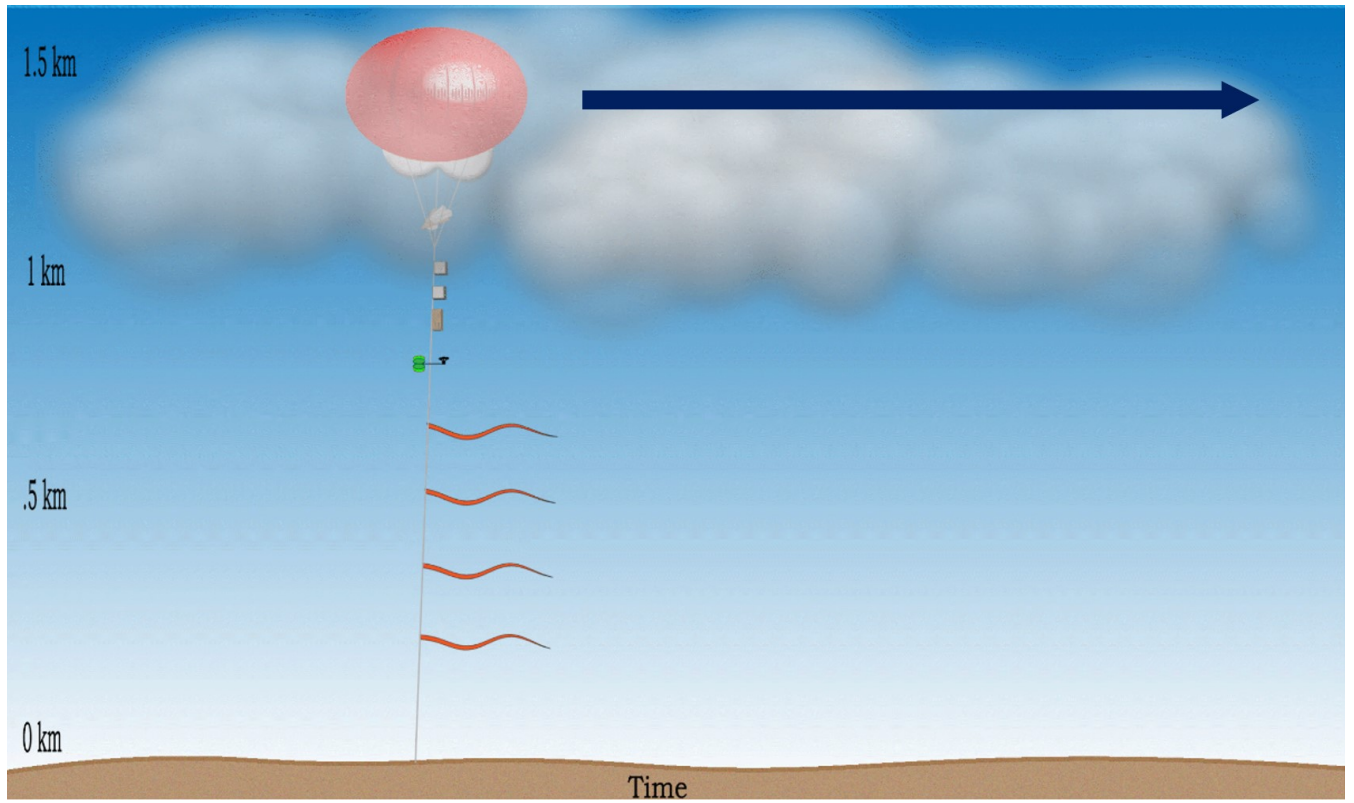

Figure S1. TBS typical loitering flight pattern at the cloudy condition.

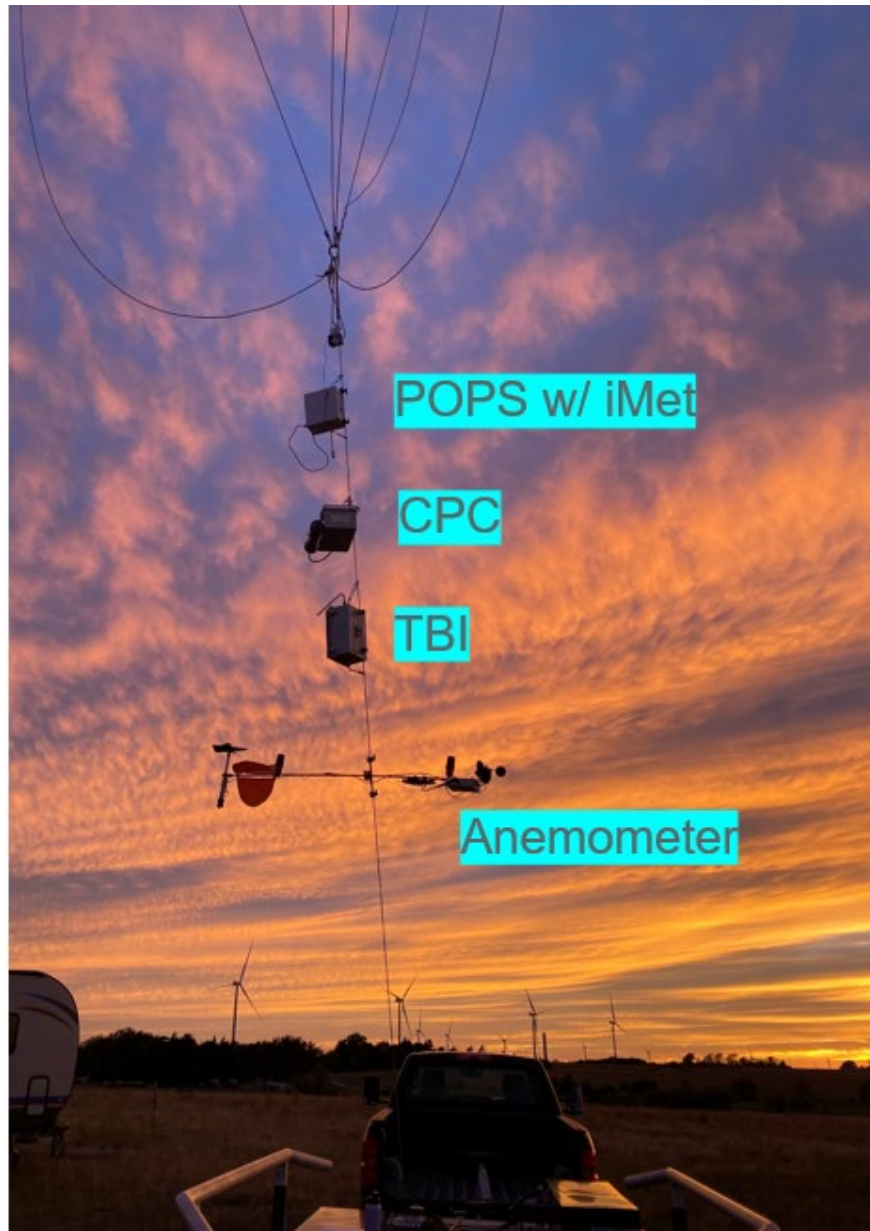

Figure S2 Typical TBS payload at the SGP site included POPS, iMet, CPC, and TBI..

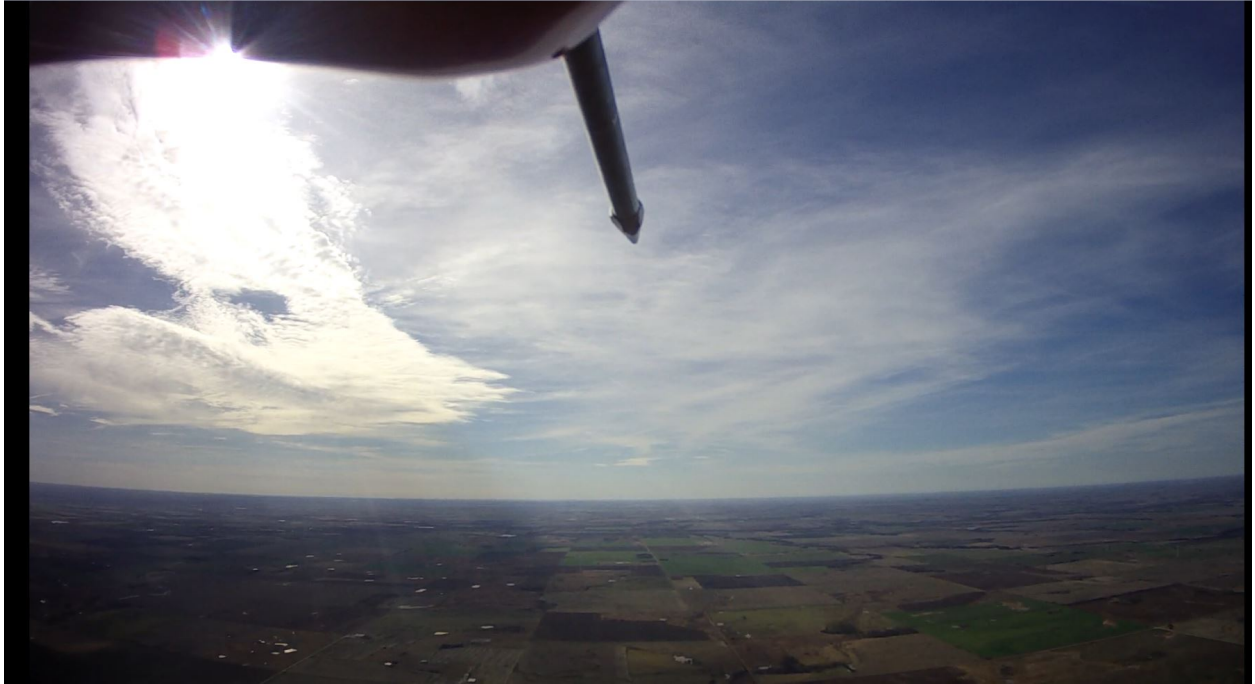

Figure S3. The iso-kinetic inlet tip – photo taken during flight on Nov. 13, 2021

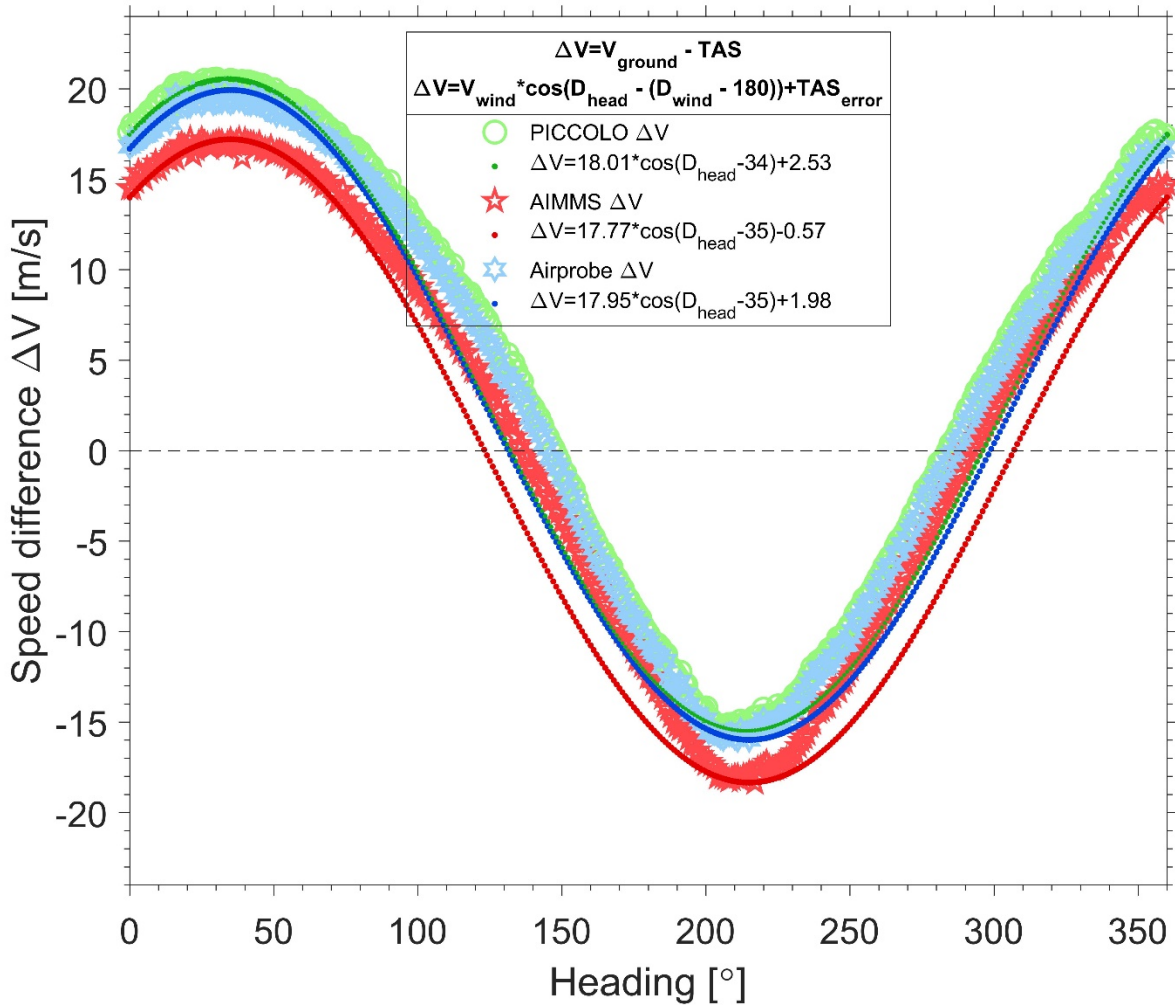

Figure S4, TAS comparison among AIMMS-30, PICCOLO, and Airprobe sensors from a flight on 11/08/2021

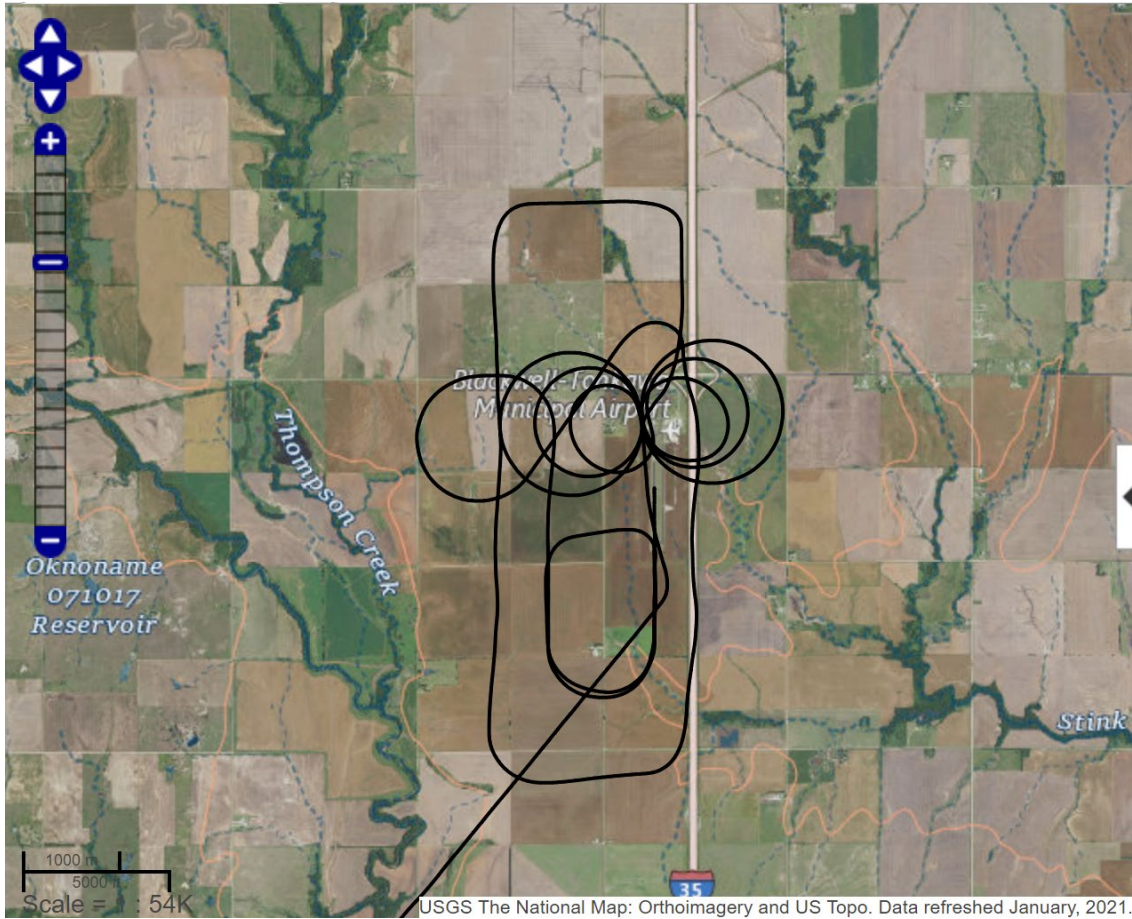

Figure S5. Flight pattern from one of the AIMMS-30 calibrations on 11/11/2021 (web map browser © 1994-2021 The MathWorks, Inc.)

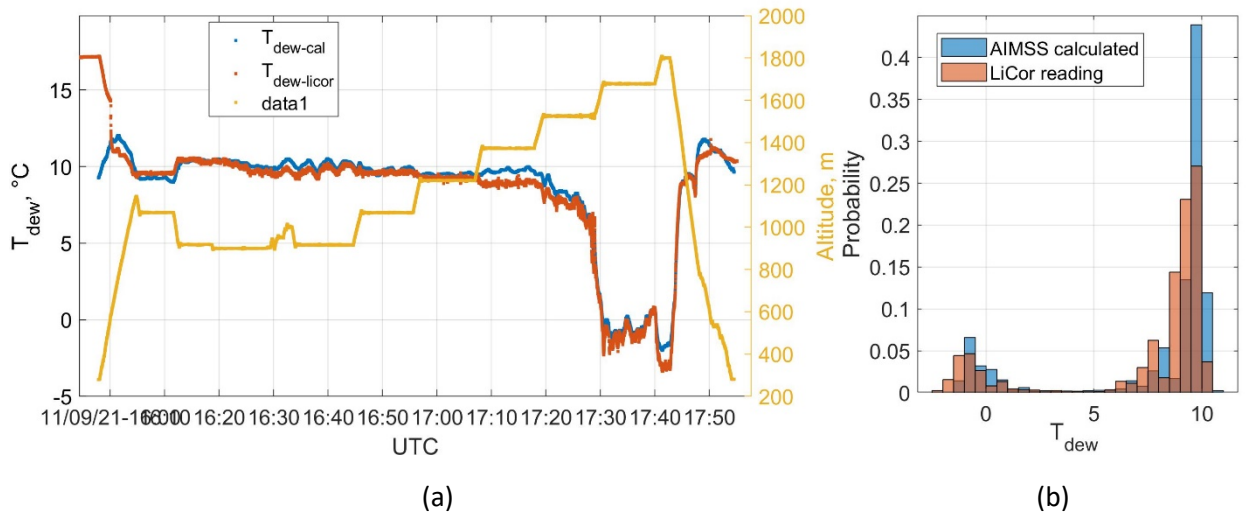

Figure S6. Dew point comparison between the LiCor Sensor measured values and values derived from the AIMMS temperature and RH measurements. (a) time series plot of the data from a flight on

11/09/2021; yellow line depicts altitude profile; (b) the probability distributions for the “ladder” pattern period between 16:35 – 17:40, 11/09/2021

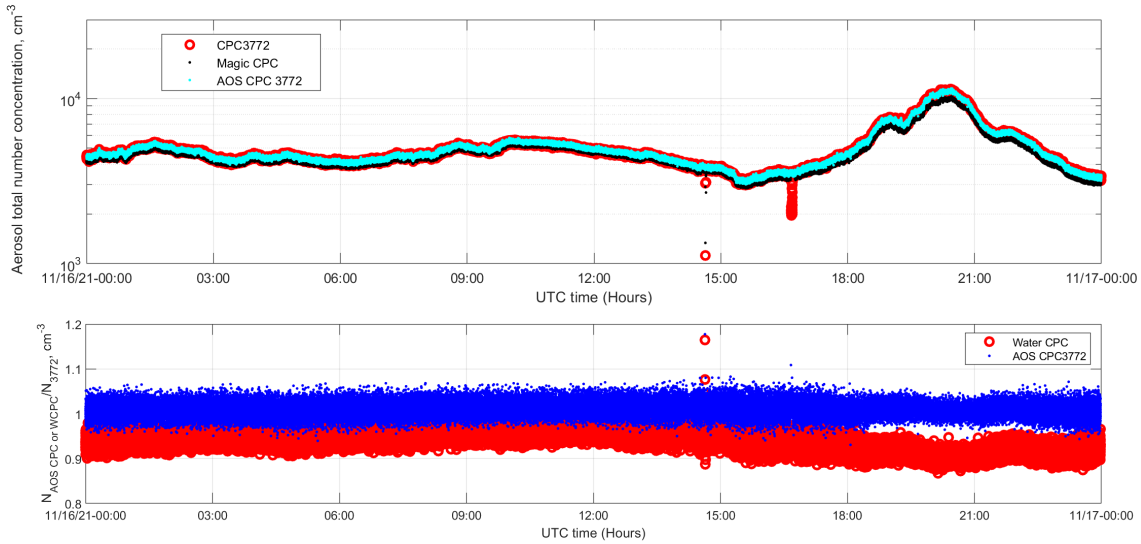

Fig S7. The time series plot of the AGMS CPC 3772 and Magic CPC compared with the AOS CPC 3772.

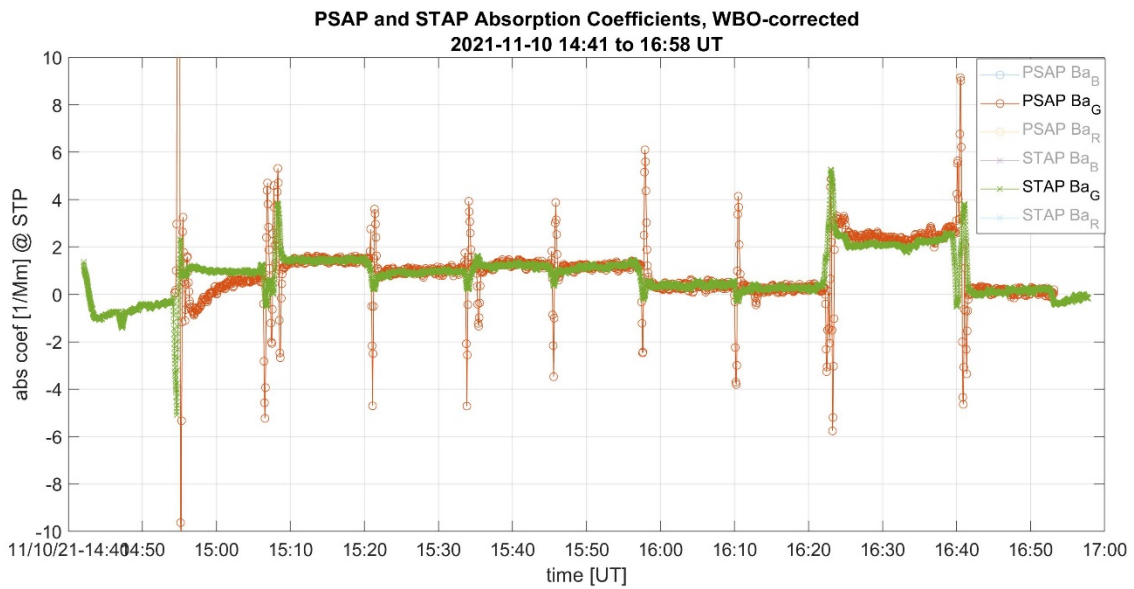

Fig S8. The time series plot of the AGMS PSAP compared with the STAP using the PSL particles of different sizes (203 nm, 269 nm, 303 nm, 400 nm, 450 nm, 496 nm, 707 nm, 903 nm). Note that the data from only one wavelength (green) is shown for clarity.

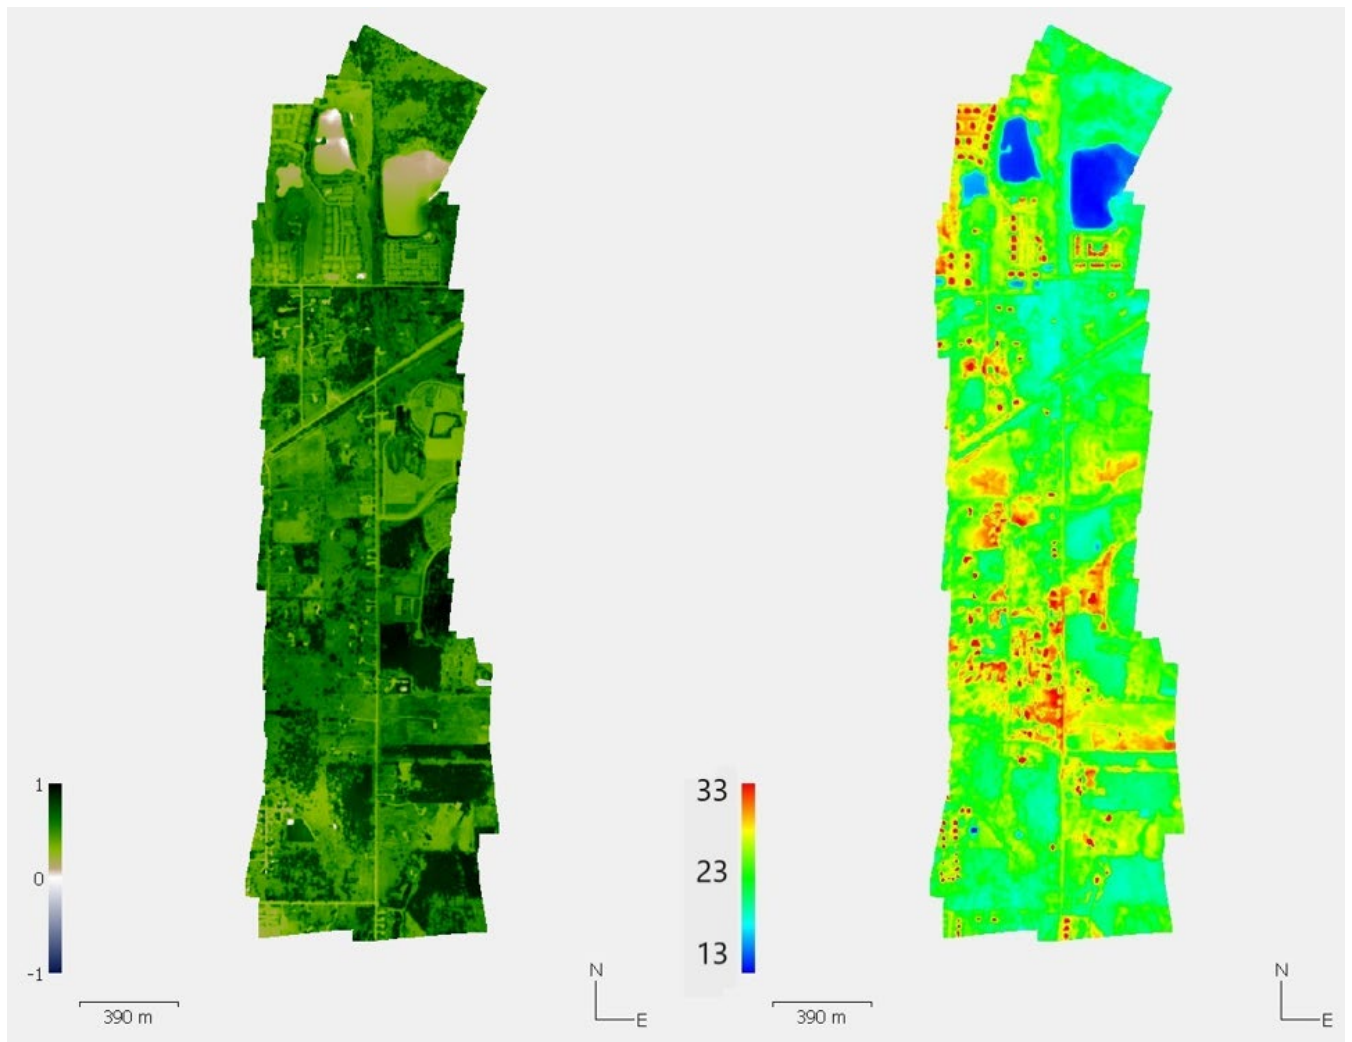

Figure S9. Multispectral images (right: surface temperature; left: GNDVI) from the Altum camera during a deployment in March, 2021 over Starkville, MS.

Table S1. Description of the TigerShark Configuration.

| Parameter                    | Description                                                   | Unit   |
|------------------------------|---------------------------------------------------------------|--------|
| Aircraft Manufacturer        | Navmar Applied Sciences Corporation                           | [-]    |
| Aircraft Type                | TigerShark                                                    | [-]    |
| Aircraft Model               | Block 3 XP                                                    | [-]    |
| Aircraft Registration Number | N459MS                                                        | [-]    |
| Propeller Type               | 2 blades                                                      | [-]    |
| Engine Model                 | Herbrandson 372                                               | [-]    |
| Engine Serial Number         | N/A                                                           | [-]    |
| Engine Modifications         | None                                                          | [-]    |
| Engine Performance           | 32 hp / 8000 rpm<br>6500 rpm with 32" x 18" 2-blade propeller | [-]    |
| Maximum Takeoff Weight       | 515                                                           | [lbs]  |
| Length                       | 14.25                                                         | [ft]   |
| Height                       | 3.42                                                          | [ft]   |
| Wingspan                     | 21.25                                                         | [ft]   |
| Payload Capacity             | 100                                                           | [lbs]  |
| Endurance                    | 8 – 12                                                        | [hrs.] |
| Max Speed                    | 80                                                            | [kts]  |
| Cruise Speed                 | 60                                                            | [kts]  |
| Wing Incidence Angle         | +4                                                            | [deg]  |

Table S2. The instruments integrated in the AGMS.

| Instrument                                             | Description                                                                               | Source/Supplier      |
|--------------------------------------------------------|-------------------------------------------------------------------------------------------|----------------------|
| Condensation Particle Counter (CPC, model 3772)        | Total aerosol concentration >0.007 $\mu\text{m}$                                          | TSI Inc.             |
| Water-based Condensation Particle counter (Magic™ CPC) | Total aerosol concentration >0.007 $\mu\text{m}$                                          | Aerosol Devices Inc. |
| Ultra-High Sensitivity Aerosol Spectrometer (UHSAS)    | Aerosol size distribution (0.60-1 $\mu\text{m}$ )                                         | DMT Inc.             |
| Particle soot absorption photometer (PSAP)             | The optical extinction coefficient for absorption at three wavelengths (470, 522, 660 nm) | Radianc Research     |



Table S3. TBS deployment at the SGP observatory in 2021

| SGP Site | 2021 Operating Month | Operating Dates in Month                       | Accumulated Flight Hours (hr:m) | Operating Hours (UTC) | Maximum Operating Altitude (m) | Sky Conditions                                                                            |
|----------|----------------------|------------------------------------------------|---------------------------------|-----------------------|--------------------------------|-------------------------------------------------------------------------------------------|
| CF       | February             | 1, 5, 6, 9, 11                                 | 19:15                           | 15-24                 | 900                            | Clear skies 2/1; Cloud bases 300m - 3.80km 2/5, 2/6, 2/9, 2/11                            |
| EF36     | February             | 5, 6                                           | 8:38                            | 16-24                 | 520                            | Cloud bases 300m - 2.8km                                                                  |
| EF9      | February             | N/A                                            | N/A                             | N/A                   | N/A                            | N/A                                                                                       |
| CF       | May                  | 12, 13, 17, 19, 20, 21                         | 28:36                           | 13-24                 | 1400                           | Cloud bases 300m - 5.6km 5/12, 5/13, 5/17, 5/19, 5/20 5/21                                |
| EF36     | May                  | 13                                             | 6:00                            | 16-24                 | 1400                           | Cloud bases 2.0km - 2.3km on 5/13                                                         |
| EF9      | May                  | 17, 19, 20                                     | 13:17                           | 15-24                 | 1020                           | Cloud bases 500m - 6.3km 5/17 to 5/20                                                     |
| CF       | July                 | 19, 20, 21, 22, 23, 24, 25, 26, 27, 28, 29, 30 | 40:21                           | 13-22                 | 1500                           | Cloud bases 300m - 7.6km on 7/19 to 7/30                                                  |
| EF36     | July                 | 21, 22, 23, 24, 25, 26                         | 19:03                           | 13-23                 | 1000                           | Cloud bases 400m - 7.7km on 7/21 to 7/26                                                  |
| EF9      | July                 | 27, 28, 29                                     | 11:33                           | 15-22                 | 1160                           | Cloud bases 1.5km - 7.5km on 7/27 to 7/29                                                 |
| CF       | October              | 4, 5, 6, 7, 8, 10, 11, 13, 14, 15              | 33:39                           | 14-24                 | 1500                           | Clear skies 10/5, 10/8, 10/11 ; Cloud bases 200m - 7.9km on 10/4-10/7, 10/10, 10/13-10/15 |
| EF36     | October              | 6, 7                                           | 8:26                            | 13-23                 | 1215                           | Cloud bases 2.2km - 5.7km on 10/6, 10/7                                                   |
| EF9      | October              | 13, 14                                         | 5:39                            | 14-24                 | 1100                           | Cloud bases 650m on 10/14                                                                 |

Table S4. TigerShark November deployment at the SGP observatory

| Date       | Takeoff (CT)            | Landed (CT) | Flight Time (hours) | Total Flight Time |
|------------|-------------------------|-------------|---------------------|-------------------|
| 11/8/2021  | 8:42                    | 9:12        | 0.50                | 0.5               |
| 11/9/2021  | 9:57                    | 11:54       | 1.95                | 2.45              |
| 11/10/2021 | Weather / Soft Down Day |             |                     |                   |
| 11/11/2021 | 8:34                    | 11:58       | 3.40                | 5.85              |
| 11/12/2021 | Weather / Hard Down Day |             |                     |                   |
| 11/13/2021 | 9:15                    | 13:19       | 4.07                | 9.92              |
| 11/14/2021 | 12:18                   | 13:04       | 0.77                | 10.68             |
| 11/15/2021 | 8:26                    | 11:46       | 3.33                | 14.02             |
| 11/16/2021 | 8:38                    | 10:00       | 1.37                | 15.38             |

Table S5. Information of the merged TBS data product.

| Variable                                                                                   | Units             | Valid Range   | Input data stream |
|--------------------------------------------------------------------------------------------|-------------------|---------------|-------------------|
| Ceilometer boundary layer height candidates (up to 3)                                      | m AGL             | N/A           | ceilpblht.a0      |
| Quality of ceilometer boundary layer height candidates (up to 3)                           | 1                 | [1,3]         | ceilpblht.a0      |
| Ceilometer cloud base height candidates (up to 3)                                          | m AGL             | [0,7700]      | ceilpblht.a0      |
| Quality of ceilometer cloud base height candidates (up to 3)                               | 1                 | [1,3]         | ceilpblht.a0      |
| Condensation particle counter (CPC) altitude                                               | m MSL             | [0,2000]      | tbscpc.b1         |
| Condensation particle counter latitude                                                     | degree N          | [-90,90]      | tbscpc.b1         |
| Condensation particle counter longitude                                                    | degree E          | [-180,180]    | tbscpc.b1         |
| Total number concentration from CPC for particles > 10 nm                                  | 1/cm <sup>3</sup> | [0,20000]     | tbscpc.b1         |
| Quality of CPC total number concentration for particles > 10 nm                            | 1                 | [1,3]         | tbscpc.b1         |
| Air temperature of iMet radiosonde corrected for solar radiation                           | deg C             | Site specific | tbsimet.a1        |
| Raw air temperature of iMet                                                                | deg C             | Site specific | tbsimet.a1        |
| Ascent rate of iMet                                                                        | m/s               | [-20,20]      | tbsimet.a1        |
| Battery voltage of iMet                                                                    | V DC              | [2,7]         | tbsimet.a1        |
| Frostpoint of iMet                                                                         | deg C             | [-40,40]      | tbsimet.a1        |
| Ascent rate of iMet derived from GPS                                                       | m/s               | [-20,20]      | tbsimet.a1        |
| Atmospheric pressure derived from GPS altitude, temperature, and relative humidity of iMet | hPa               | Site specific | tbsimet.a1        |
| Altitude derived from atmospheric pressure of iMet                                         | km MSL            | [0,2]         | tbsimet.a1        |
| Relative humidity of iMet                                                                  | %                 | [0,100]       | tbsimet.a1        |
| Air temperature from iMet relative humidity sensor                                         | deg C             | Site specific | tbsimet.a1        |
| Potential temperature from iMet                                                            | deg K             | [233,313]     | tbsimet.a1        |
| Total column water from iMet                                                               | mm                | [0,50]        | tbsimet.a1        |
| Water vapor mixing ratio from iMet                                                         | ppmv              | [0,10000]     | tbsimet.a1        |
| Air temperature of iMet XQ2 corrected for solar radiation                                  | deg C             | Site specific | tbsimetxq2.b1     |
| Atmospheric pressure of iMet XQ2                                                           | hPa               | Site specific | tbsimetxq2.b1     |
| Relative humidity of iMet XQ2                                                              | %                 | [0,100]       | tbsimetxq2.b1     |

|                                                              |                    |               |               |
|--------------------------------------------------------------|--------------------|---------------|---------------|
| Air temperature from iMet XQ2 relative humidity sensor       | deg C              | Site specific | tbsimetxq2.b1 |
| Altitude from iMet XQ2 GPS                                   | m MSL              | Site specific | tbsimetxq2.b1 |
| POPS aerosol number concentration between 135 – 150 nm       | 1/cm <sup>-3</sup> | N/A           | tbspops.b1    |
| POPS aerosol number concentration between 150 – 170 nm       | 1/cm <sup>-3</sup> | N/A           | tbspops.b1    |
| POPS aerosol number concentration between 170 – 195 nm       | 1/cm <sup>-3</sup> | N/A           | tbspops.b1    |
| POPS aerosol number concentration between 195 – 220 nm       | 1/cm <sup>-3</sup> | N/A           | tbspops.b1    |
| POPS aerosol number concentration between 220 – 260 nm       | 1/cm <sup>-3</sup> | N/A           | tbspops.b1    |
| POPS aerosol number concentration between 260 – 335 nm       | 1/cm <sup>-3</sup> | N/A           | tbspops.b1    |
| POPS aerosol number concentration between 335 – 510 nm       | 1/cm <sup>-3</sup> | N/A           | tbspops.b1    |
| POPS aerosol number concentration between 510 – 705 nm       | 1/cm <sup>-3</sup> | N/A           | tbspops.b1    |
| POPS aerosol number concentration between 705 – 1380 nm      | 1/cm <sup>-3</sup> | N/A           | tbspops.b1    |
| POPS aerosol number concentration between 1380 – 1760 nm     | 1/cm <sup>-3</sup> | N/A           | tbspops.b1    |
| POPS aerosol number concentration between 1760 – 2550 nm     | 1/cm <sup>-3</sup> | N/A           | tbspops.b1    |
| POPS aerosol number concentration between 2550 – 3615 nm     | 1/cm <sup>-3</sup> | N/A           | tbspops.b1    |
| POPS total number concentration including particles < 135 nm |                    |               |               |
| POPS altitude                                                | m MSL              | [0,2000]      | tbspops.b1    |
| POPS latitude                                                | degree N           | [-90,90]      | tbspops.b1    |
| POPS longitude                                               | degree E           | [-180,180]    | tbspops.b1    |
| Anemometer wind speed                                        | m/s                | [0,40]        | tbswind.a1    |
| Anemometer vertical wind speed                               | m/s                | [0,40]        | tbswind.b1    |
| Anemometer 1s wind gust                                      | m/s                | [0,40]        | tbswind.b1    |
| GNSS-derived wind direction                                  | degree             | [0,360]       | tbswind.b1    |
| Anemometer and GNSS heading sensor altitude                  | m MSL              | [0,2000]      | tbswind.b1    |
| Anemometer and GNSS heading sensor latitude                  | degree N           | [-90,90]      | tbswind.b1    |
| Anemometer and GNSS heading sensor longitude                 | degree E           | [-180,180]    | tbswind.b1    |
