# Supplementary material for: Observational data from uncrewed systems over Southern Great Plains
Source: Copernicus journal article supplement (doi:10.5194/essd-2022-73), 2022-03-21
Supplement: Supplementary file [file essd-2022-73-AC1-supplement.pdf]

The manuscript is well-written and requires only minimal technical edits.

**Response: We sincerely appreciate the comments and suggestions from our reviewer. We address your specific comments below (also in blue). The line number corresponds to the change-tracked version.**

Technical corrections:

line 29: and throughout. Check references with "De Boer" which are listed in the Reference Section as "de Boer".

**Response: changed the reference to “de Boer” in manuscript.**

line 309 state the figure number. Text presently reads "Fig. (b)" which should be Fig. 12 (b).

**Response: corrected it in line 331 to “Fig. 12 (b)”.**

line 360: indicate, as stated in the abstract, that access to the data archive requires user registration to the site.

**Response: We added a sentence in line 383. “Note that ADC requires user registration to access the data archive.”**

**Citation:** <https://doi.org/10.5194/essd-2022-73-RC1>
